# Supplementary material for: Hydroxide-bridged dicopper complexes: the influence of secondary coordination sphere on structure and catecholase activity
Source: Royal Society of Chemistry journal article supplement (doi:10.1039/c6dt04858g), 2017-01-01
Supplement: c6dt04858g1.pdf [file c6dt04858g1.pdf]

**Electronic Supplementary Information**

**for the**

**Manuscript Entitled**

**Hydroxide-bridged dicopper complexes: Influence of secondary coordination  
sphere on structure and catecholase activity**

Deepak Bansal and Rajeev Gupta\*

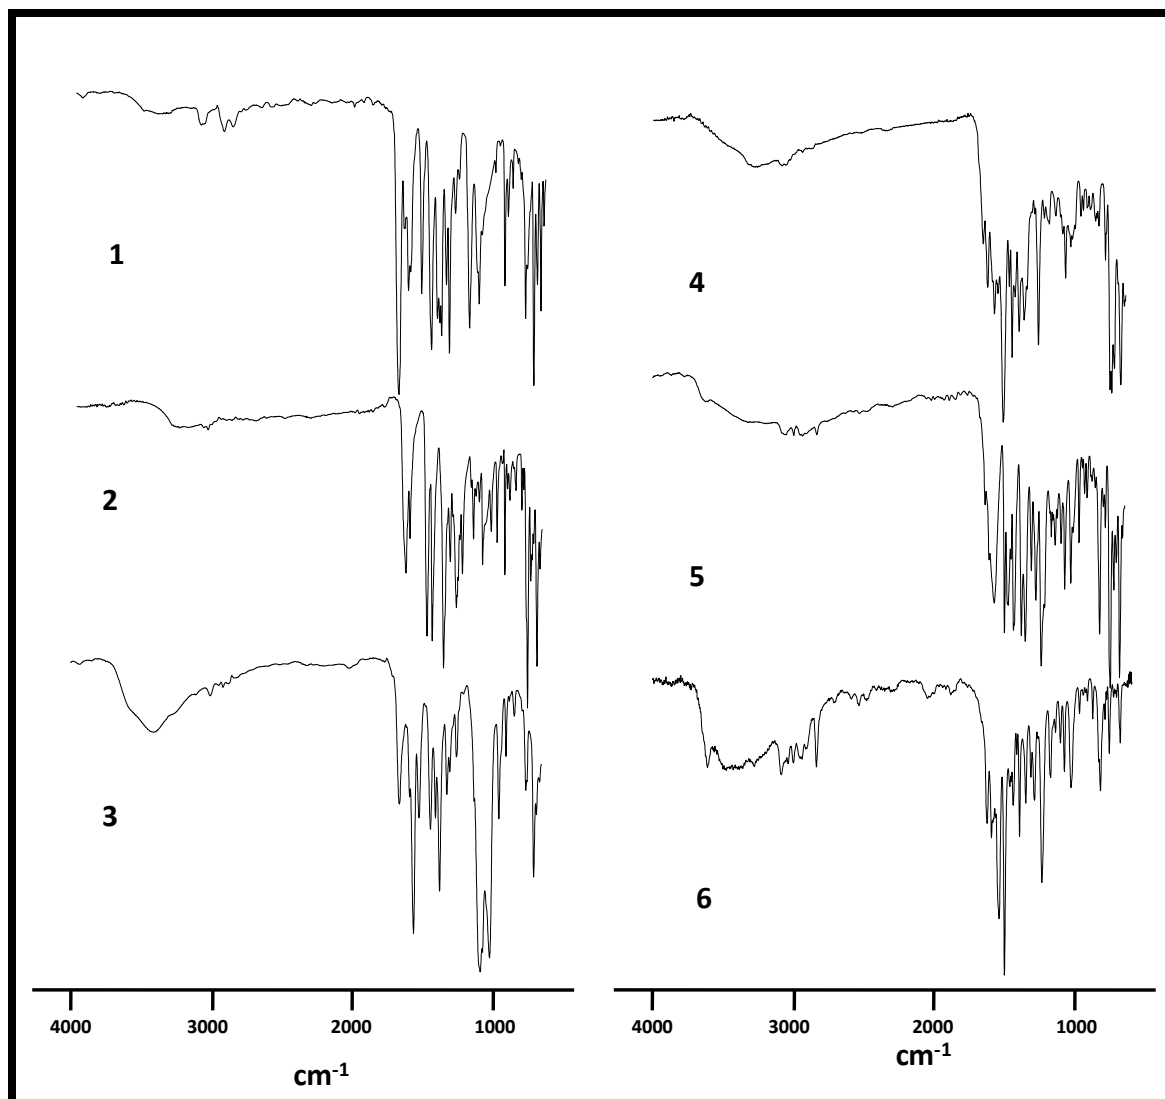

**Figure S1.** FTIR spectra of complexes **1-6**.

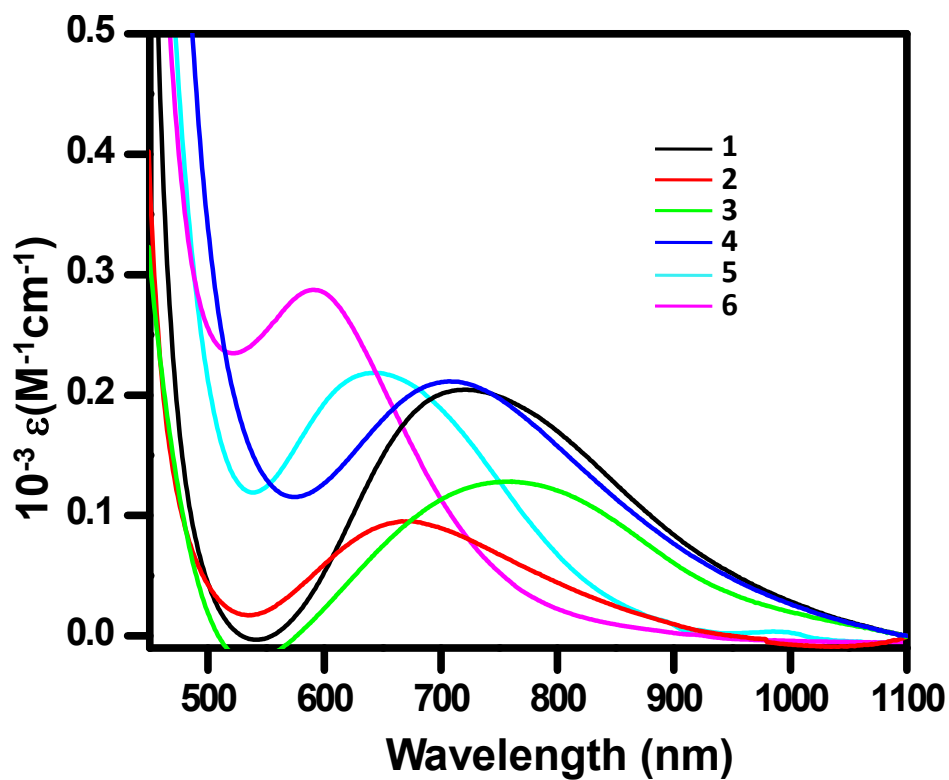

Figure S2. Absorption spectra of complexes 1-6 recorded in DMF solvent.

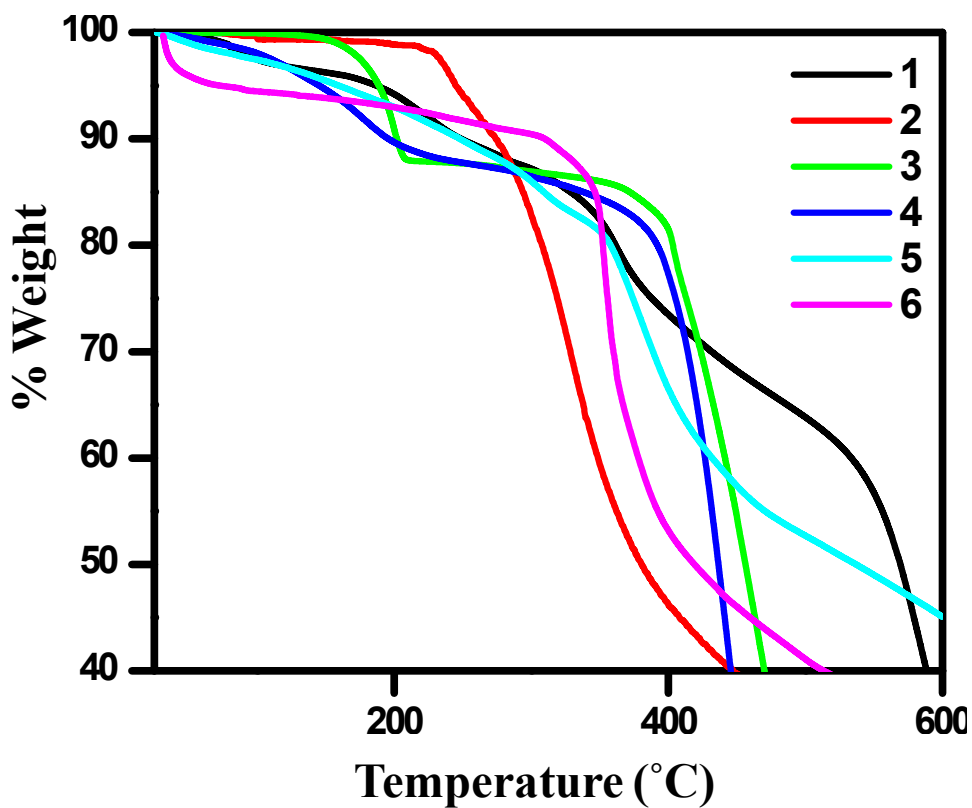

Figure S3. Thermal Gravimetric Analysis (TGA) plots for complexes 1-6.

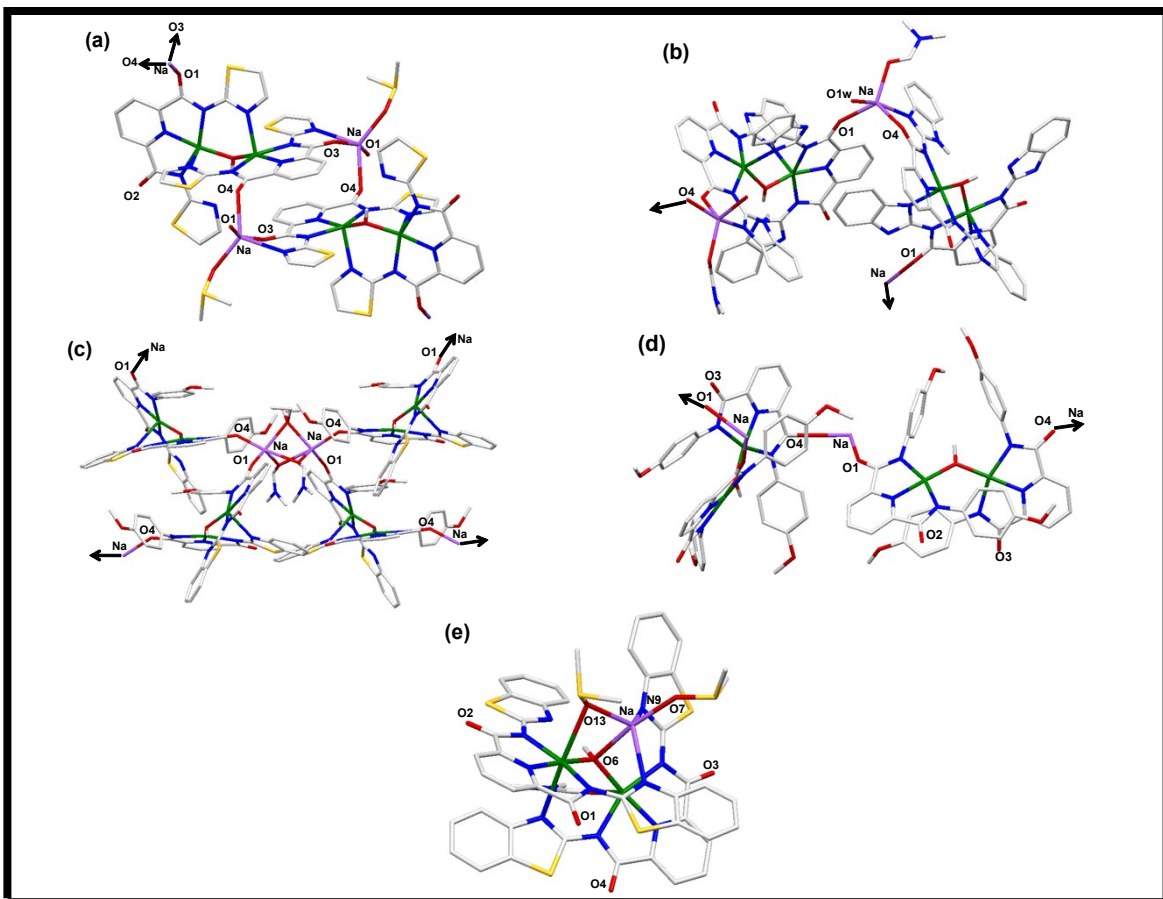

**Figure S4.** Crystal structures of complexes **1** (a), **2** (e), **4** (b), **5** (c) and **6** (d) displaying the coordination of complex anion with the sodium ion.

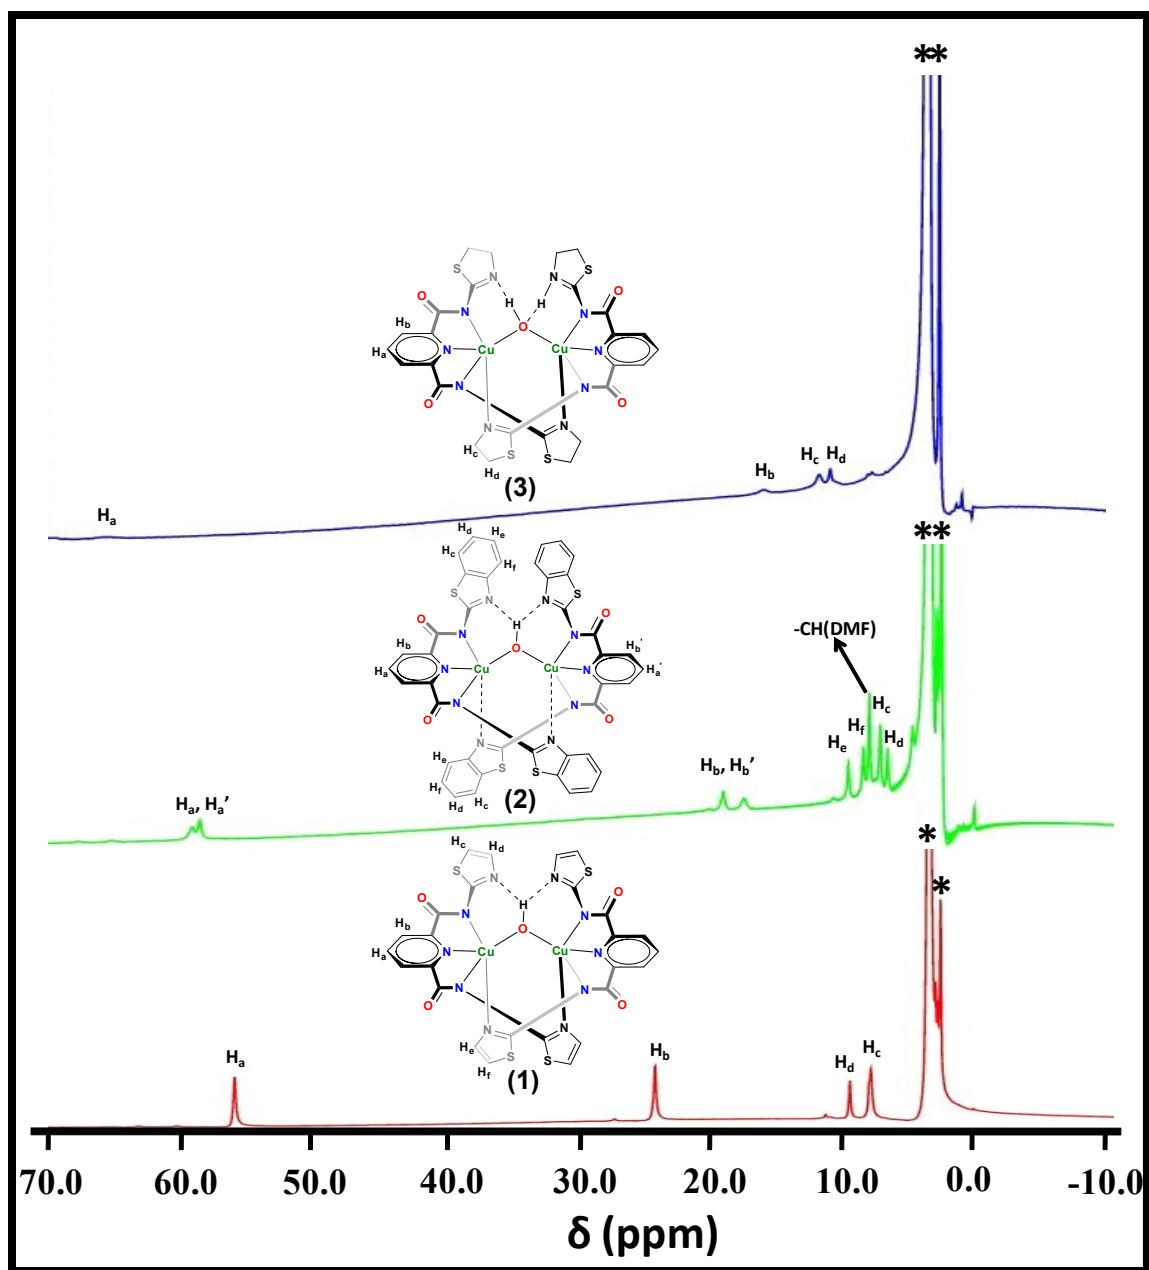

**Figure S5.**  $^1\text{H}$  NMR spectra of complexes **1-3** in  $d_6$ -DMSO; \* represents the residual solvent and  $\text{H}_2\text{O}$  peak, respectively.

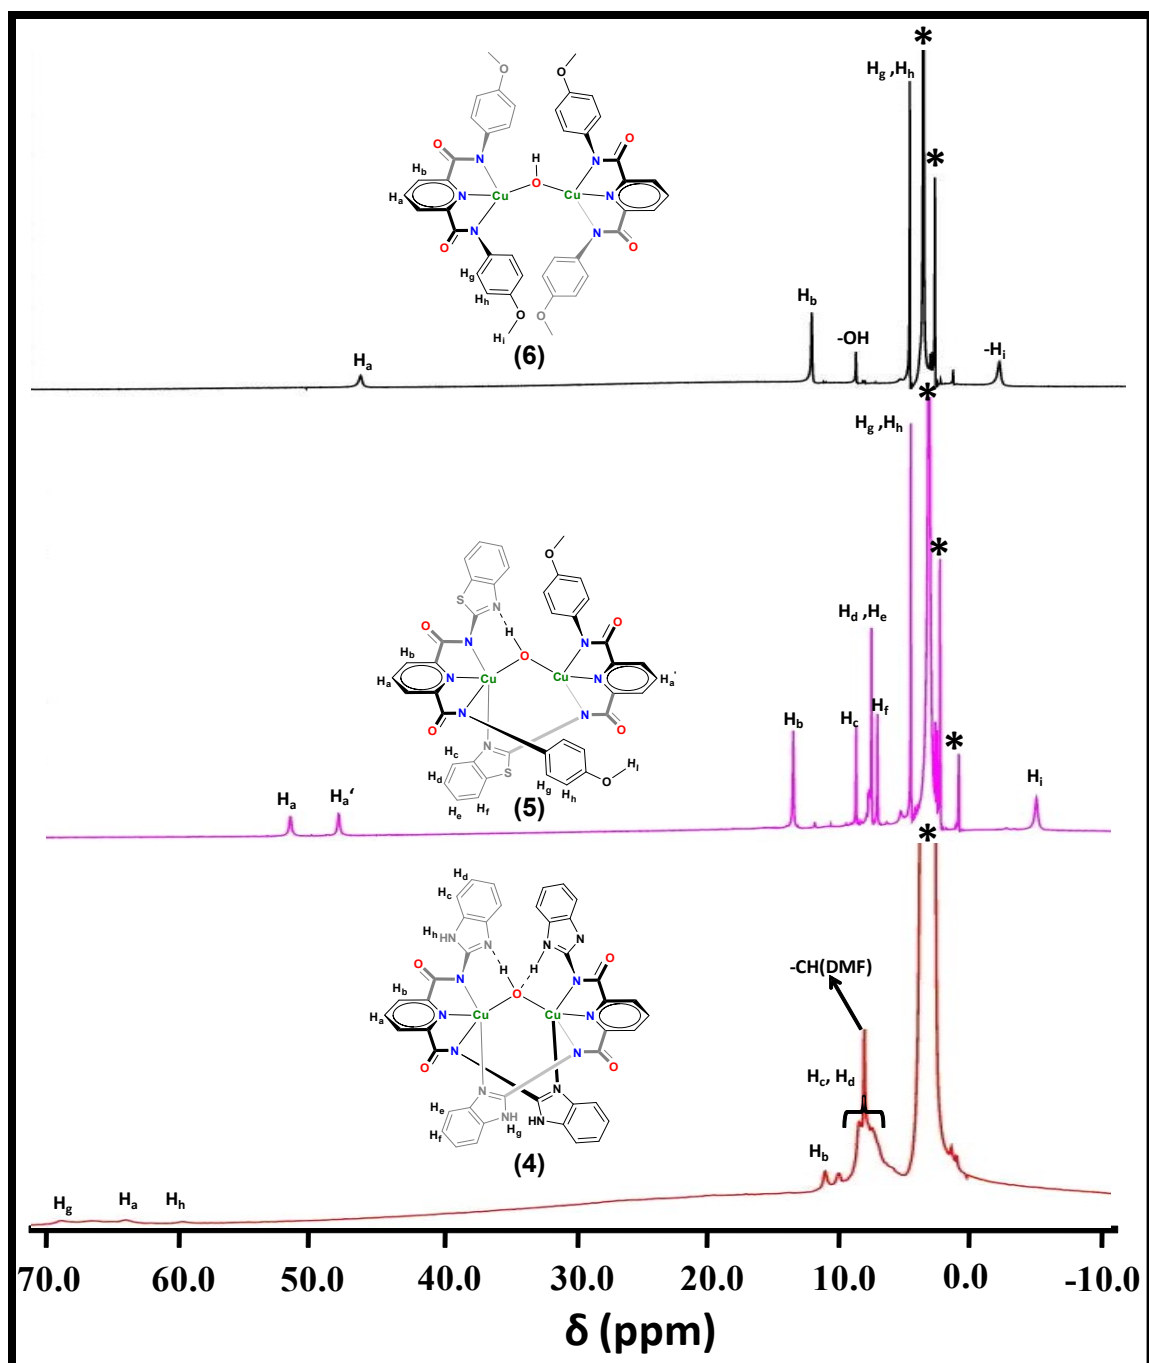

**Figure S6.**  $^1\text{H}$  NMR spectra of complexes 4-6 in  $d_6$ -DMSO; \* represents the residual solvent and  $\text{H}_2\text{O}$  peak, respectively.

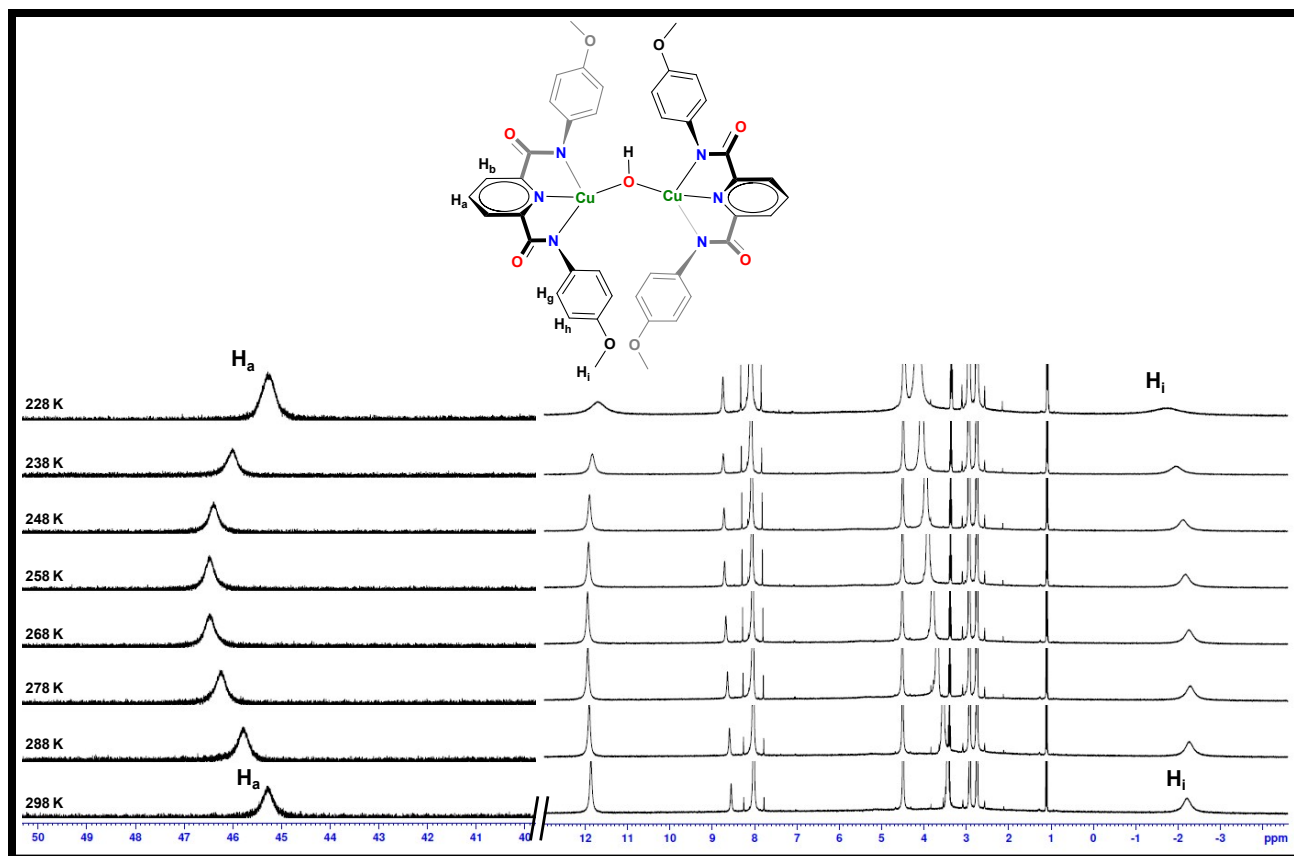

Figure S7. Variable temperature  $^1\text{H}$  NMR spectrum (400 MHz) of complex 6 in  $d_7$ -DMF.

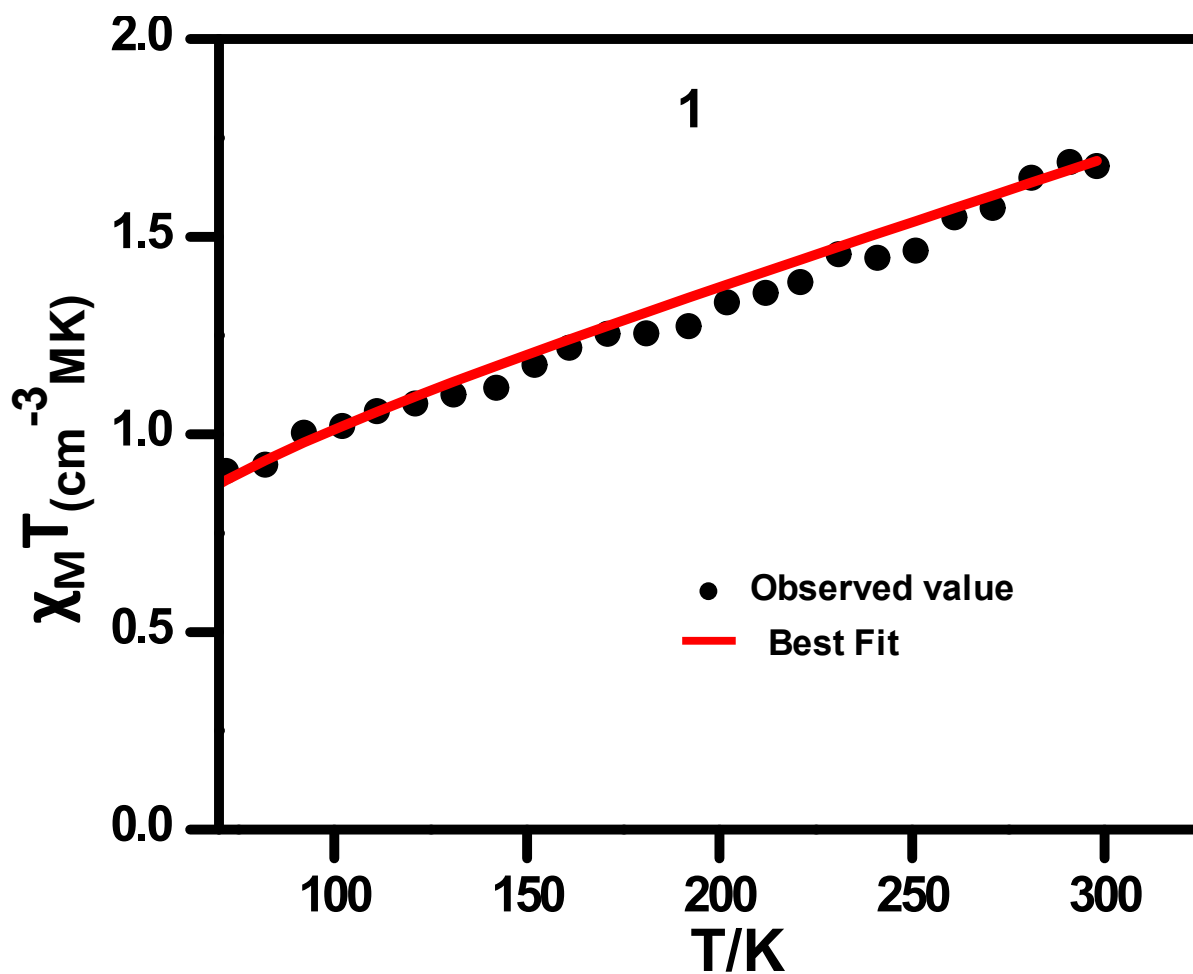

**Figure S8.** Temperature dependence of the product  $\chi_M T$  for complex **1**. The black spheres are the experimentally observed data whereas the red line is the fit to the experimental data as described in the text.



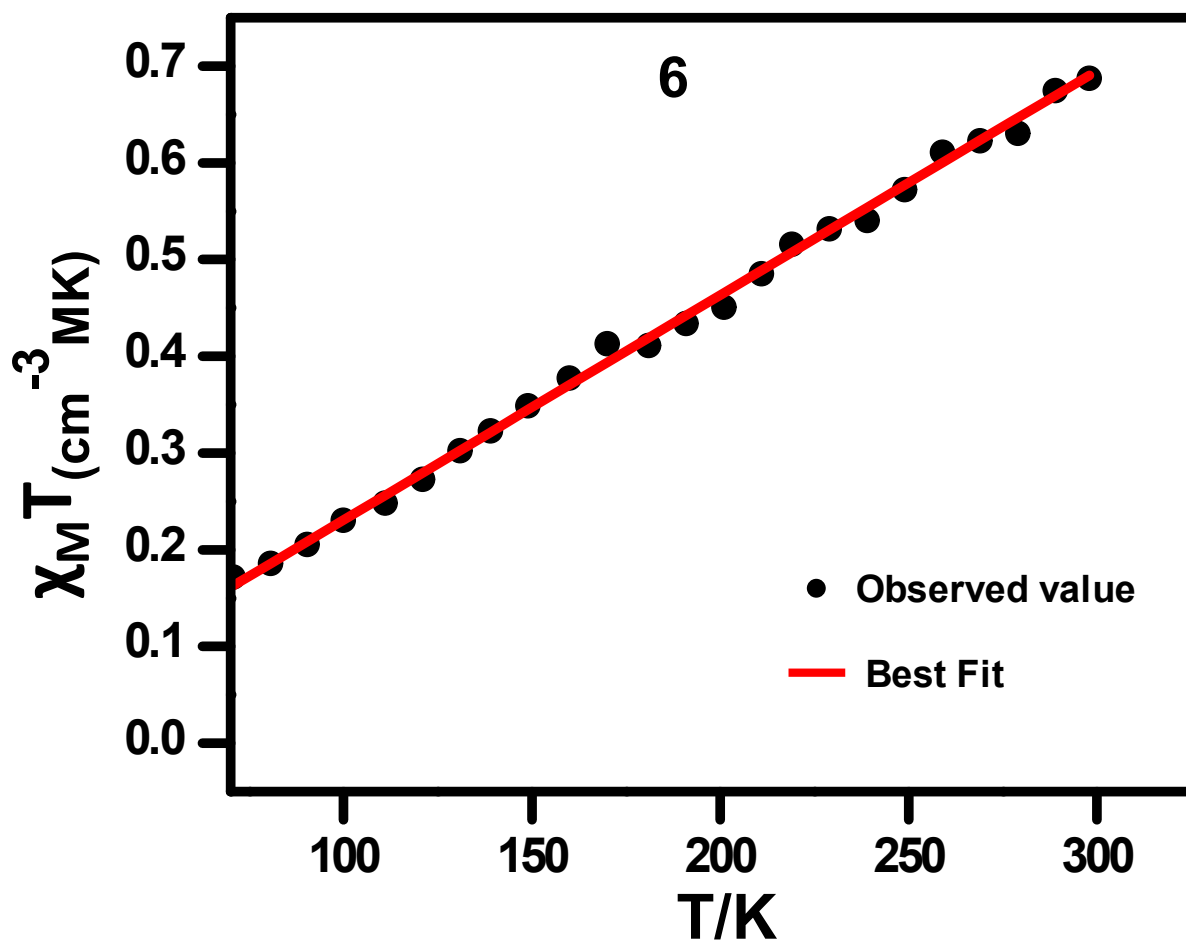

**Figure S9.** Temperature dependence of the product  $\chi_M T$  for complex **6**. The black spheres are the experimentally observed data whereas the red line is the fit to the experimental data as described in the text.

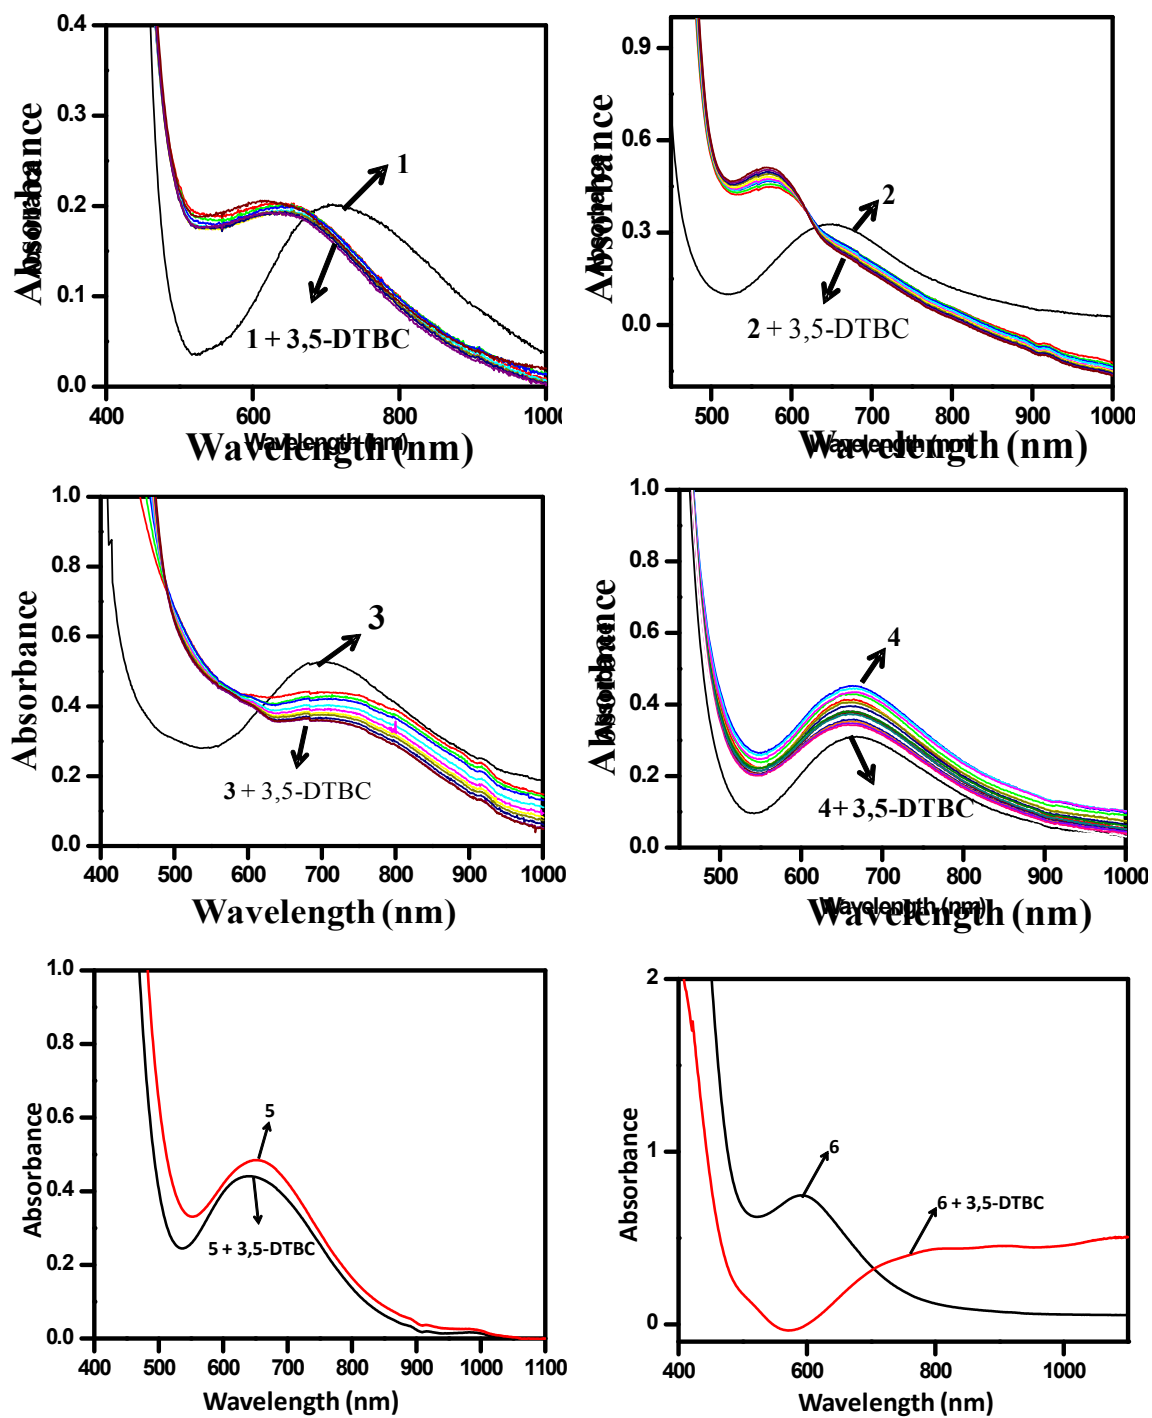

**Figure S10.** Change in absorbance of complexes 1-6 after the addition of 100 equiv. of 3,5-ditertbutyl catechol in DMSO solution.

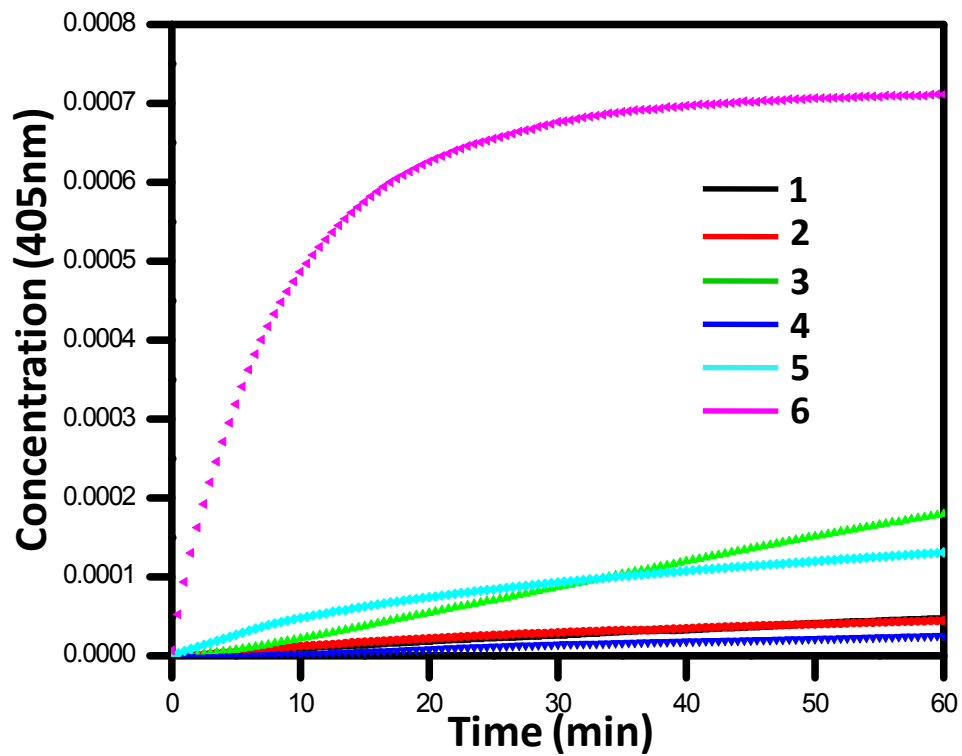

**Figure S11.** Time-dependent monitoring of change in concentration at 405 nm due to formation of 3,5-DTBQ in presence of complexes 1-6.

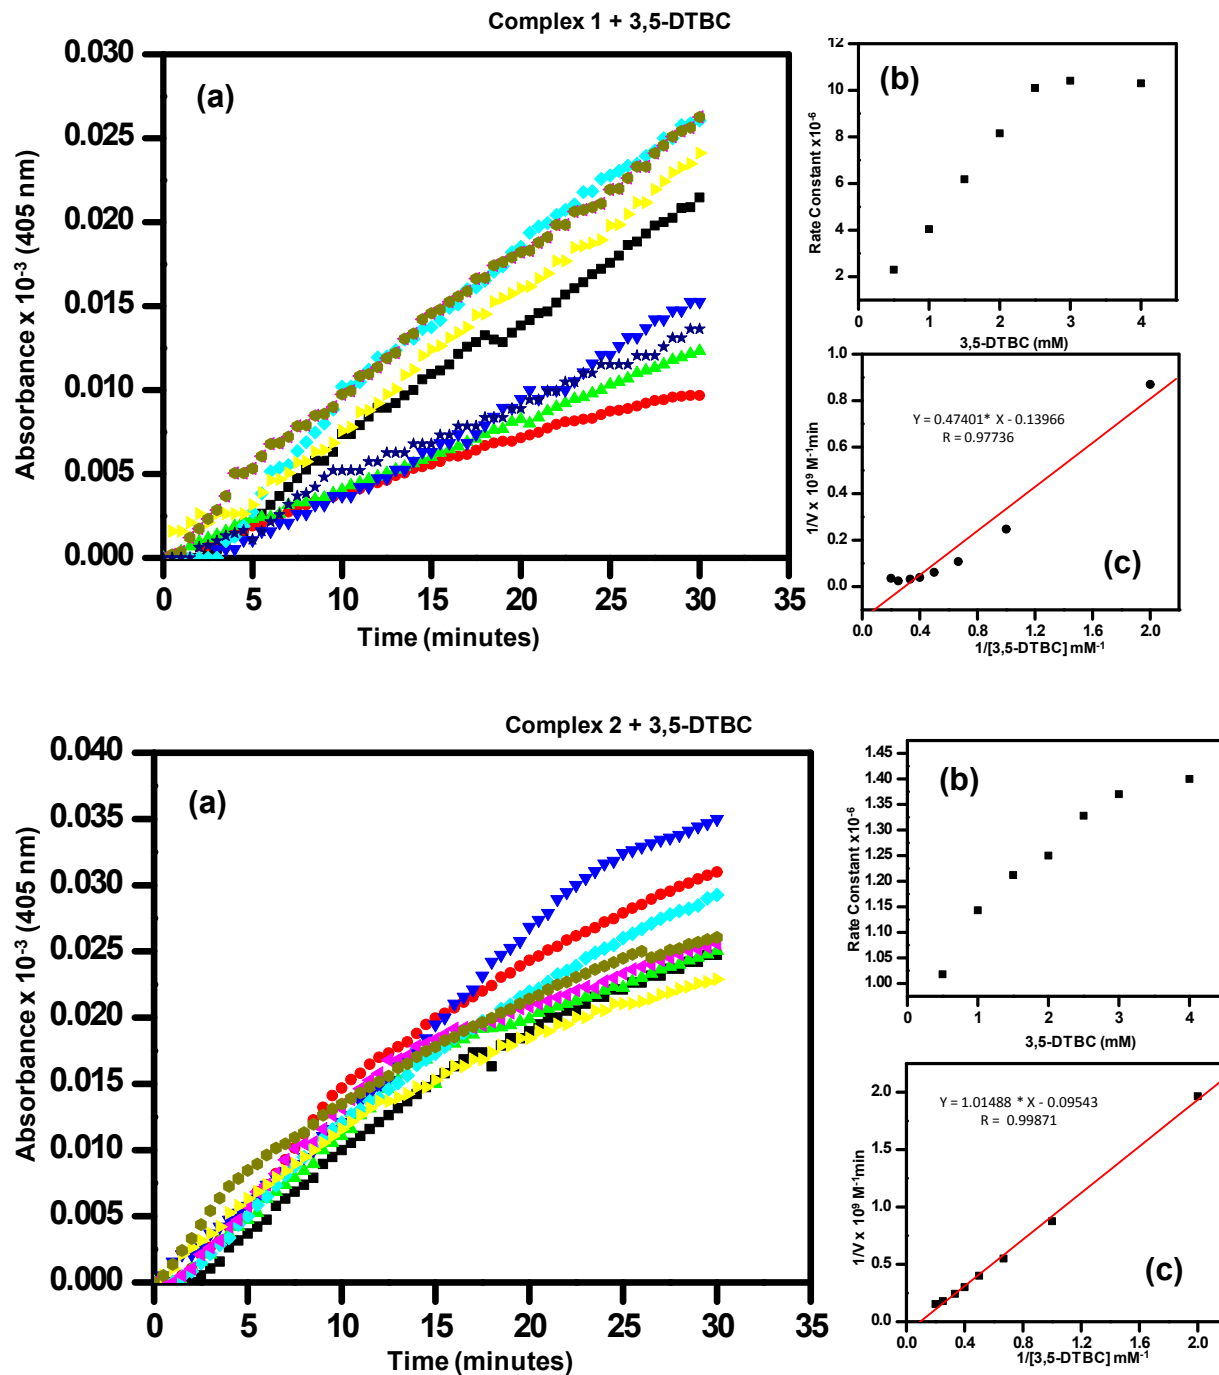

**Figure S12** (a) Time dependent monitoring of change in absorbance at 405 nm due to formation of 3,5-DTBC in presence of complex 1 (above) and 2 (below) in DMSO-MeOH mixture (Conditions: complex = 25  $\mu\text{M}$ ; 3,5-DTBC = 0.5-5.0 mM; oxygen saturated 5% DMSO-MeOH (v/v) solution; Temp = 303 K). (b) Plot between rate constant w.r.t. different concentrations of 3,5-DTBC. (c) Lineweaver-Burk plot between  $1/V$  and  $1/[S]$ .

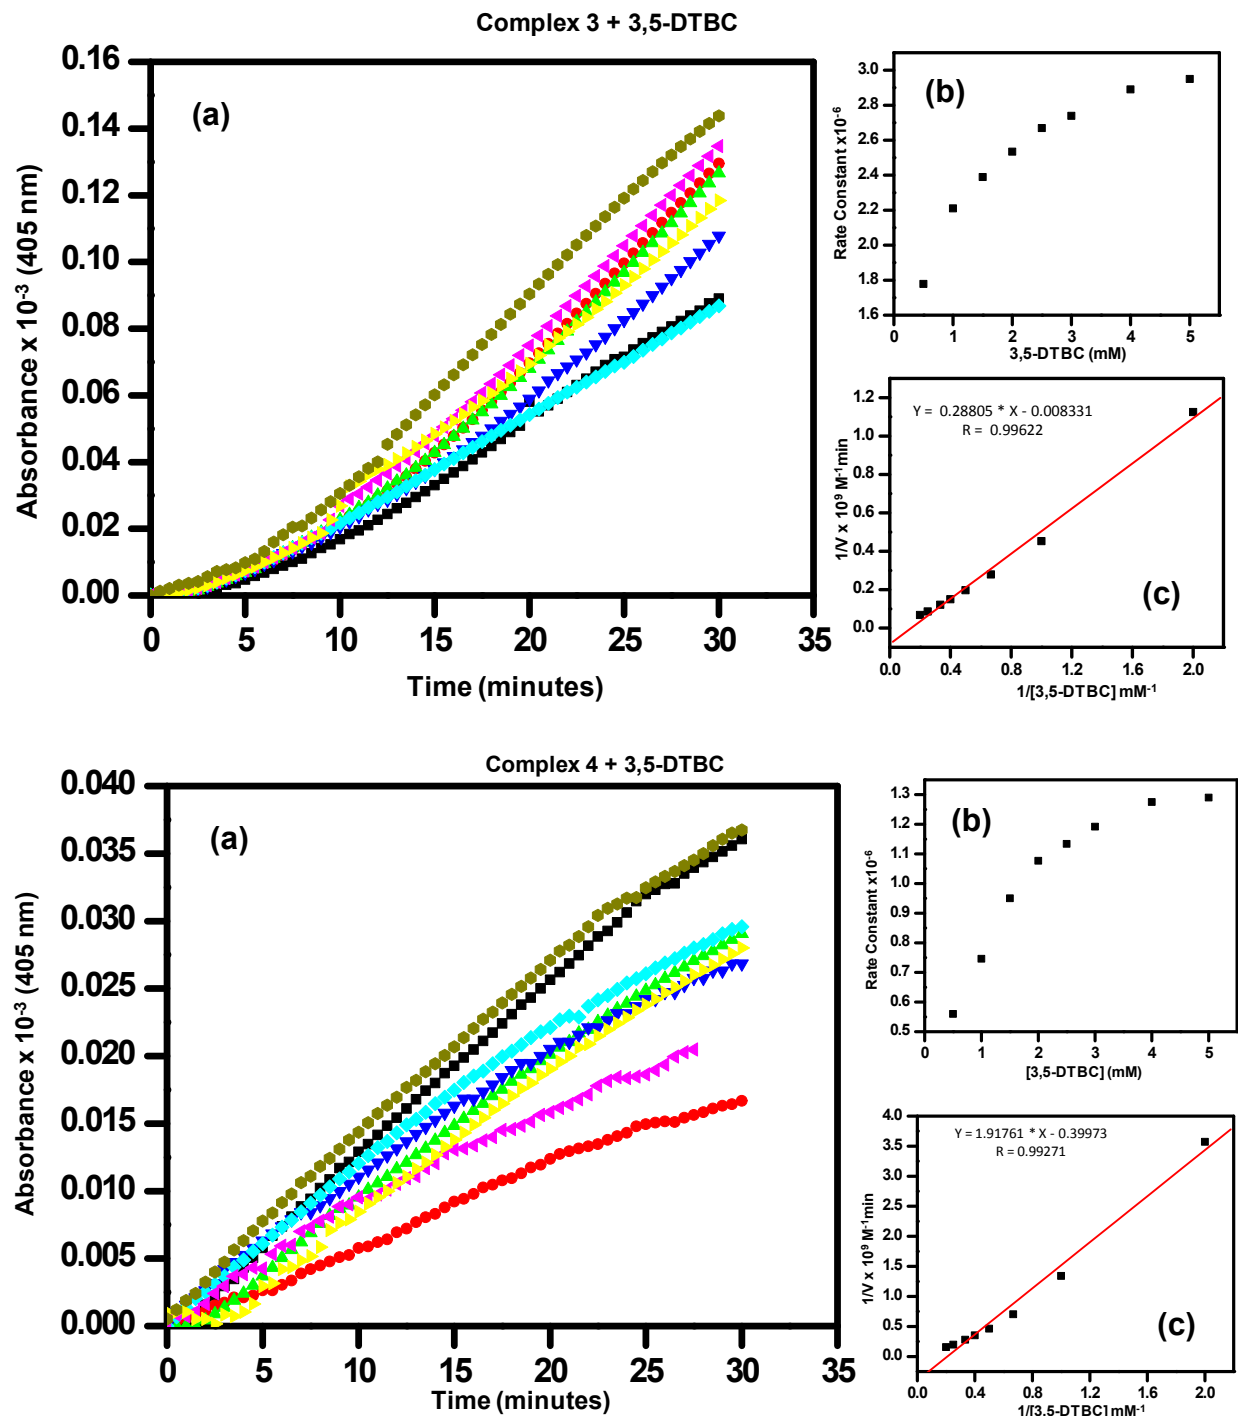

**Figure S13.** (a) Time dependent monitoring of change in absorbance at 405 nm due to formation of 3,5-DTBQ in presence of complex 3 (above) and 4 (below) in DMSO-MeOH mixture (Conditions: complex = 25  $\mu\text{M}$ ; 3,5-DTBC = 0.5-5.0 mM; oxygen saturated 5% DMSO-MeOH (v/v) solution; Temp = 303 K). (b) Plot between rate constant w.r.t. different concentrations of 3,5-DTBC. (c) Lineweaver-Burk plot between  $1/V$  and  $1/[S]$ .

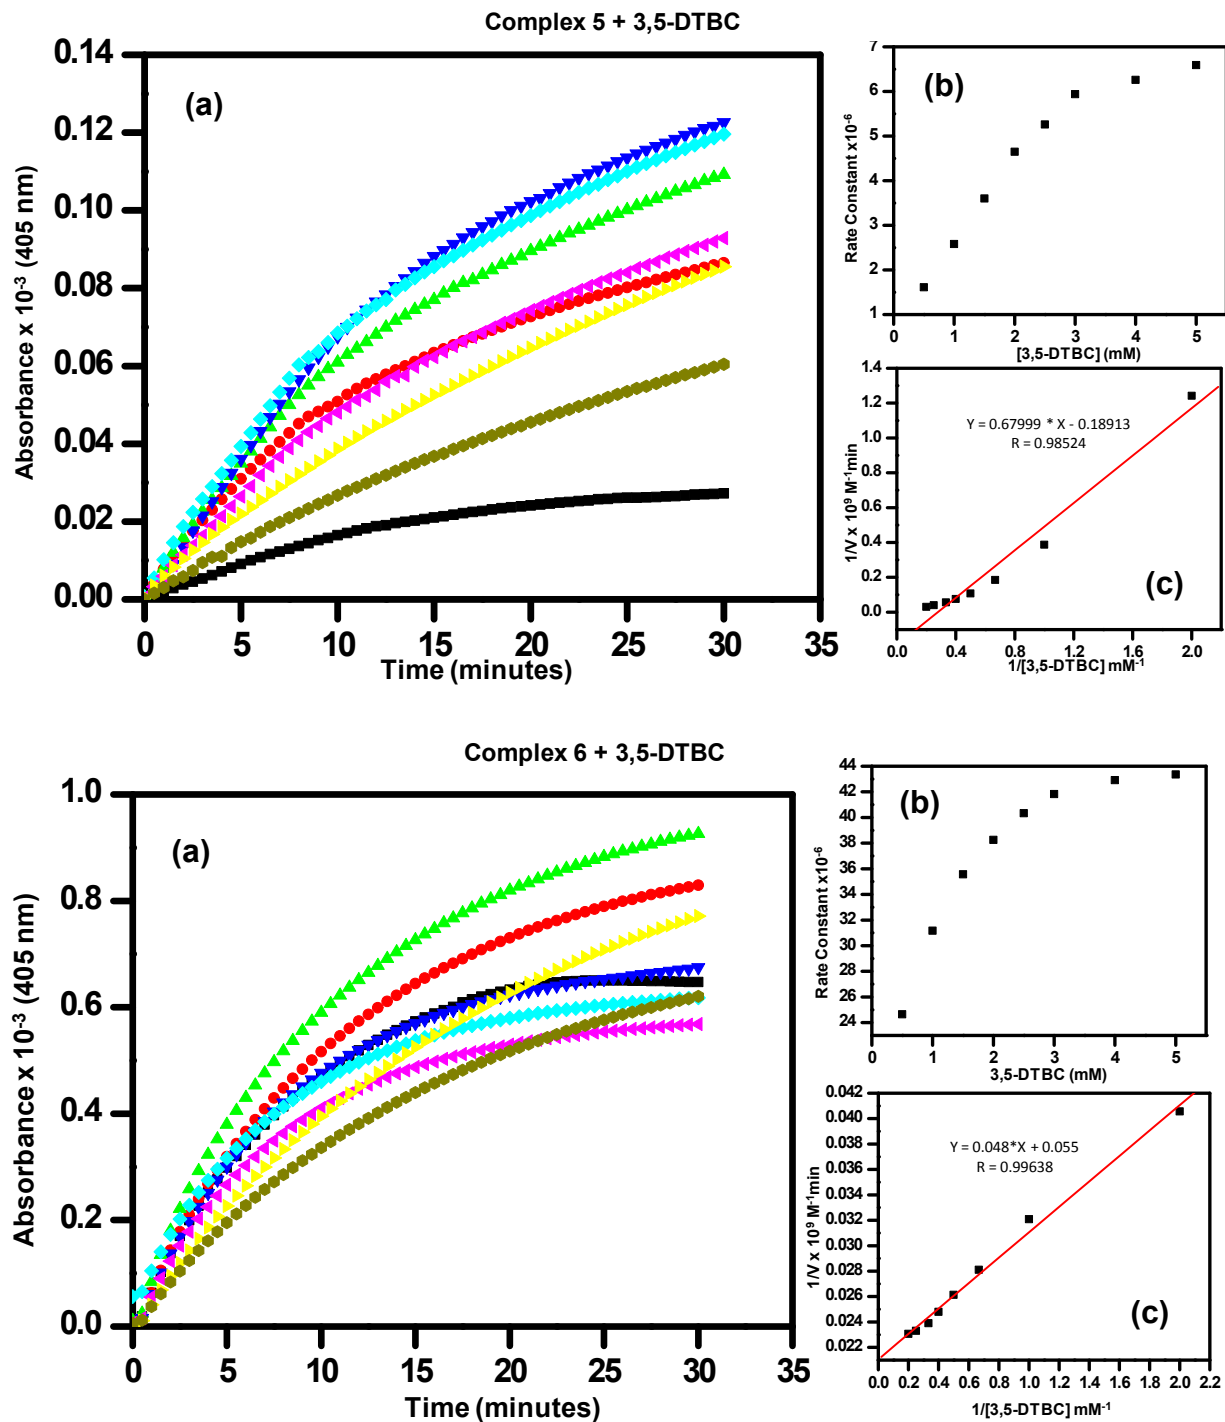

**Figure S14.** (a) Time dependent monitoring of change in absorbance at 405 nm due to formation of 3,5-DTBC in presence of complex 5 (above) and 6 (below) in DMSO-MeOH mixture (Conditions: complex = 25  $\mu\text{M}$ ; 3,5-DTBC = 0.5-5.0 mM; oxygen saturated 5% DMSO-MeOH (v/v) solution; Temp = 303 K). (b) Plot between rate constant w.r.t. different concentrations of 3,5-DTBC. (c) Lineweaver-Burk plot between  $1/V$  and  $1/[S]$ .

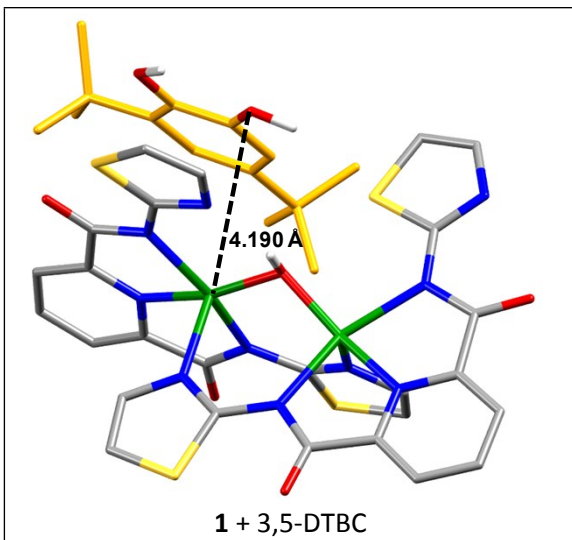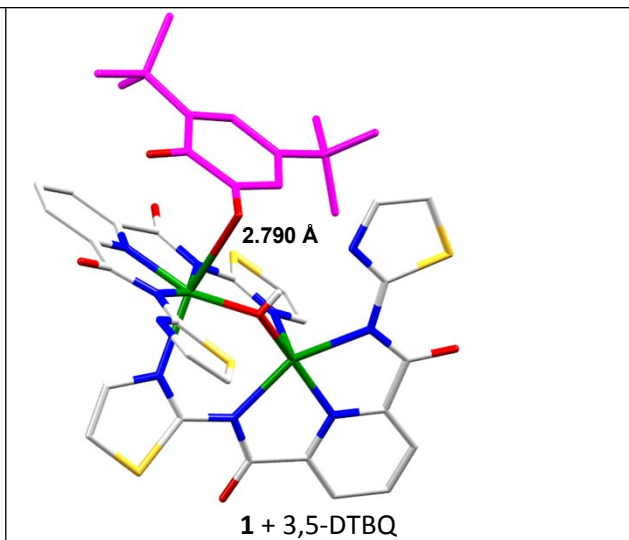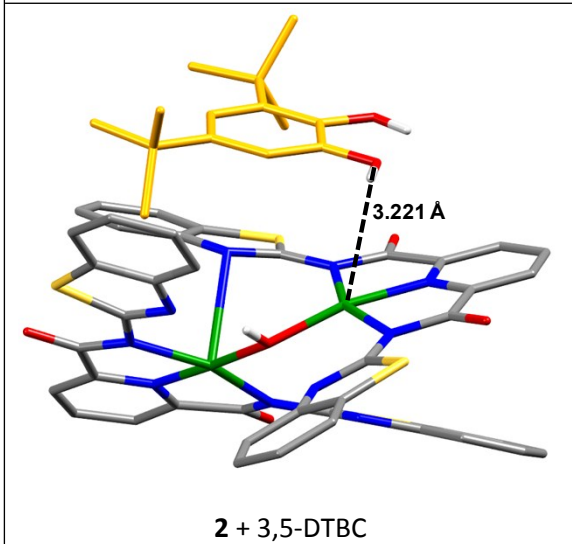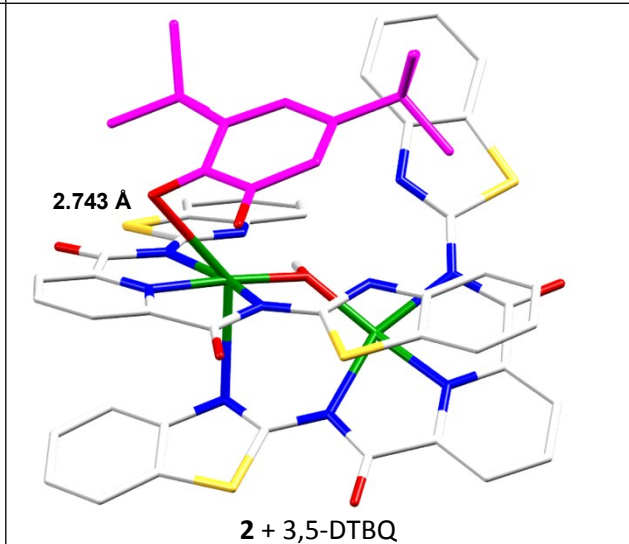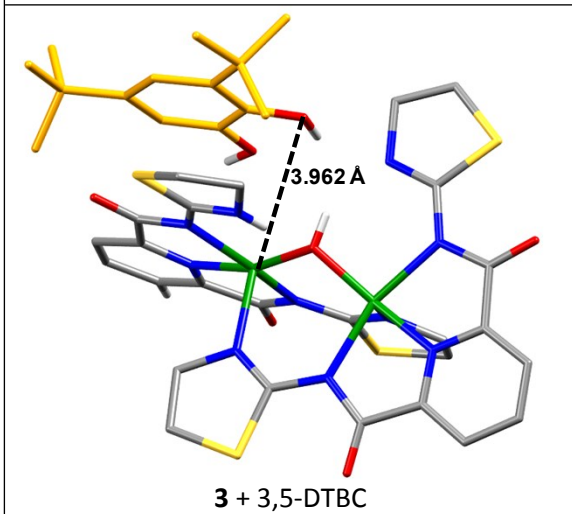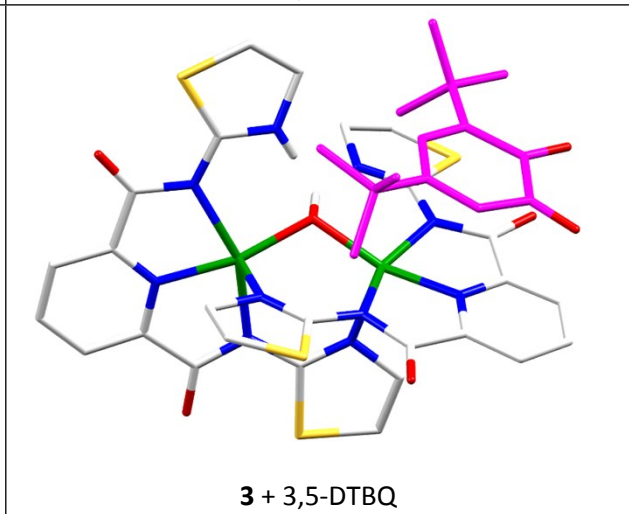

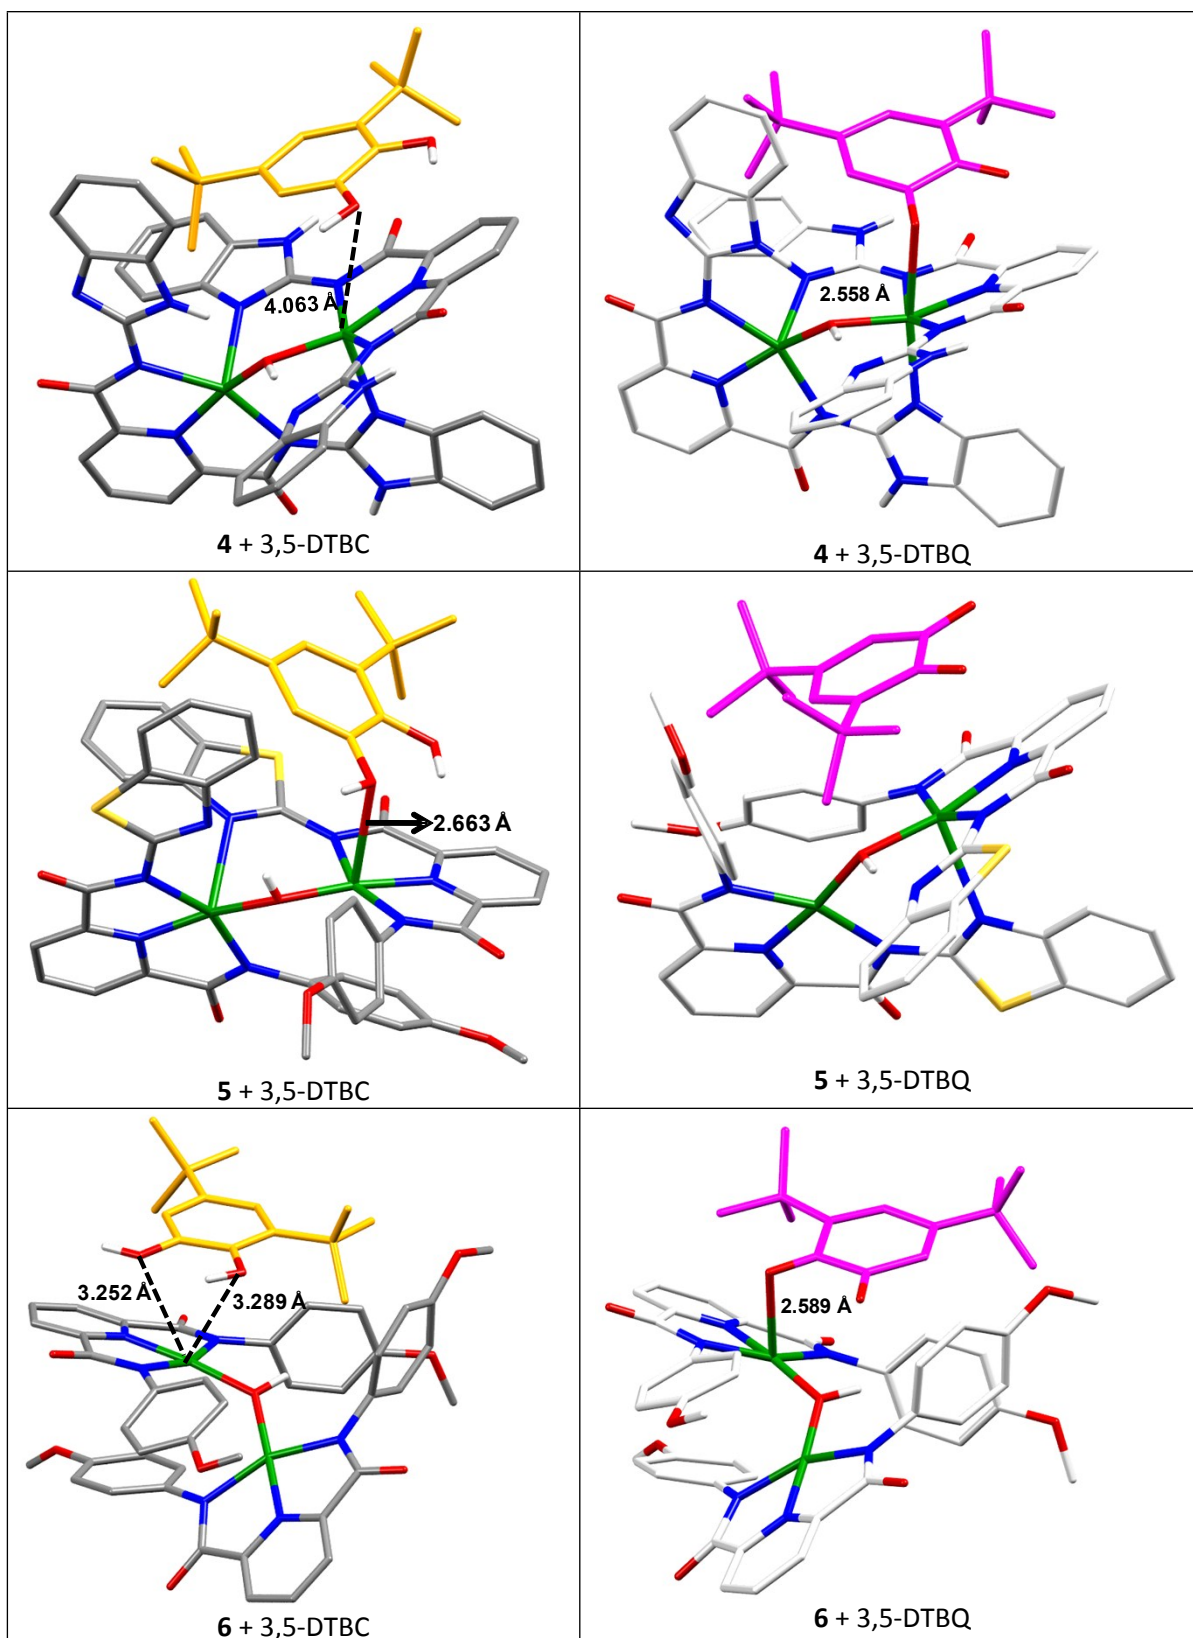

**Figure S15.** Docked structures of complexes 1-6 with 3,5-DTBC (left column) and 3,5-DTBQ (right column).



**Table S1.** Selected bond distances (Å) and angles (°) for complexes **1-5**.

| <b>Bond</b> | <b>1</b>   | <b>2</b>   | <b>3</b>   | <b>4</b> | <b>Bond</b> | <b>5</b> |
|-------------|------------|------------|------------|----------|-------------|----------|
| Cu1-N1      | 2.113(3)   | 2.096(5)   | 2.085(4)   | 2.163(5) | Cu1-N1      | 2.007(7) |
| Cu1-N2      | 1.942(3)   | 1.924(5)   | 1.936(4)   | 1.943(5) | Cu1-N2      | 1.967(7) |
| Cu1-N3      | 2.100(3)   | 2.093(5)   | 2.043(4)   | 2.117(5) | Cu1-N3      | 2.038(7) |
| Cu1-N10     | 2.196(3)   | 2.245(4)   | 2.675      | 2.198(5) | Cu1-N9      | 2.427(6) |
| Cu1-O6      | 1.890(2)   | 1.896(3)   | 1.890(3)   | 1.919(4) | Cu1-O7      | 1.922(6) |
| Cu2-N5      | 2.218(3)   | 2.191(4)   | 2.815      | 2.263(5) | Cu2-N7      | 1.894(7) |
| Cu2-N8      | 2.159(3)   | 2.126(4)   | 2.131(4)   | 2.136(5) | Cu2-N6      | 2.022(6) |
| Cu2-N7      | 1.940(3)   | 1.934(4)   | 1.943(4)   | 1.939(5) | Cu2-N8      | 2.068(7) |
| Cu2-N6      | 2.122(3)   | 2.099(4)   | 2.114(4)   | 2.100(5) | Cu2-O7      | 1.833(6) |
| Cu2-O6      | 1.888(2)   | 1.912(3)   | 1.886(3)   | 1.915(5) | -----       | -----    |
| Cu2-O6-Cu1  | 117.60(13) | 115.62(17) | 129.28(18) | 117.8(2) | Cu2-O7-Cu1  | 124.6(3) |
| O6-Cu1-N2   | 164.99(12) | 163.35(18) | 176.75(16) | 160.9(2) | O7-Cu1-N2   | 169.7(3) |
| O6-Cu1-N3   | 98.26(11)  | 96.37(18)  | 101.17(16) | 95.2(2)  | O7-Cu1-N1   | 99.5(3)  |
| N2-Cu1-N3   | 79.02(11)  | 79.6(2)    | 79.68(19)  | 79.2(2)  | N2-Cu1-N1   | 80.2(3)  |
| O6-Cu1-N1   | 101.33(11) | 101.61(16) | 99.49(16)  | 102.2(2) | O7-Cu1-N9   | 89.7(2)  |
| N2-Cu1-N1   | 78.56(11)  | 79.6(2)    | 79.84(19)  | 78.1(2)  | N2-Cu1-N9   | 100.6(3) |
| N3-Cu1-N1   | 156.21(11) | 158.07(19) | 159.17(18) | 153.9(2) | N1-Cu1-N9   | 98.5(3)  |
| O6-Cu1-N10  | 98.48(11)  | 96.44(15)  | -----      | 95.4(2)  | N3-Cu1-N9   | 92.5(3)  |
| N2-Cu1-N10  | 96.48(11)  | 100.07(19) | -----      | 103.6(2) | O7-Cu2-N7   | 173.2(3) |
| N3-Cu1-N10  | 95.32(11)  | 96.96(17)  | -----      | 103.2(2) | O7-Cu2-N6   | 100.5(3) |
| N1-Cu1-N10  | 95.02(11)  | 93.42(17)  | -----      | 94.4(2)  | N7-Cu2-N6   | 76.8(3)  |
| O6-Cu2-N7   | 161.72(12) | 162.72(16) | 166.77(16) | 163.4(2) | O7-Cu2-N8   | 99.3(3)  |
| O6-Cu2-N6   | 99.62(11)  | 105.04(15) | 99.59(15)  | 101.3(2) | N7-Cu2-N8   | 83.9(3)  |
| N7-Cu2-N6   | 79.36(11)  | 80.05(16)  | 79.21(17)  | 79.6(2)  | N6-Cu2-N8   | 159.6(3) |

---

|           |            |            |            |           |           |          |
|-----------|------------|------------|------------|-----------|-----------|----------|
| O6-Cu2-N8 | 100.07(11) | 94.48(15)  | 101.88(15) | 97.71(19) | O7-Cu1-N3 | 100.9(3) |
| N7-Cu2-N8 | 78.01(11)  | 77.63(17)  | 78.78(17)  | 78.1(2)   | N2-Cu1-N3 | 77.8(3)  |
| N6-Cu2-N8 | 156.67(11) | 156.62(17) | 157.99(16) | 156.2(2)  | N1-Cu1-N3 | 156.8(3) |
| O6-Cu2-N5 | 94.33(11)  | 94.39(15)  | -----      | 94.0(2)   | -----     | -----    |
| N7-Cu2-N5 | 103.78(11) | 101.42(16) | -----      | 102.3(2)  | -----     | -----    |
| N6-Cu2-N5 | 101.58(10) | 97.21(16)  | -----      | 98.5(2)   | -----     | -----    |
| N8-Cu2-N5 | 89.30(10)  | 93.94(17)  | -----      | 94.4(2)   | -----     | -----    |

---

**Table S2.** Crystallographic data collection and structure solution parameters for complexes **1 - 3**.

|                                                                    | <b>1•2DMSO</b>                                                                                  | <b>2•2DMSO•2DMF</b>                                                                             | <b>3•DMSO•H<sub>2</sub>O</b>                                                                  |
|--------------------------------------------------------------------|-------------------------------------------------------------------------------------------------|-------------------------------------------------------------------------------------------------|-----------------------------------------------------------------------------------------------|
| Chem. Formula                                                      | C <sub>30</sub> H <sub>27</sub> Cu <sub>2</sub> N <sub>10</sub> NaO <sub>7</sub> S <sub>6</sub> | C <sub>52</sub> H <sub>49</sub> Cu <sub>2</sub> N <sub>12</sub> NaO <sub>9</sub> S <sub>6</sub> | C <sub>28</sub> H <sub>32</sub> Cu <sub>2</sub> N <sub>10</sub> O <sub>7</sub> S <sub>5</sub> |
| Formula weight                                                     | 982.0                                                                                           | 1328.48                                                                                         | 908.02                                                                                        |
| Temp (K)                                                           | 293(2)                                                                                          | 293(2)                                                                                          | 293(2)                                                                                        |
| Crystal System                                                     | Triclinic                                                                                       | Monoclinic                                                                                      | Triclinic                                                                                     |
| Space group                                                        | <i>P</i> -1                                                                                     | <i>P</i> 2 <sub>1</sub> / <i>n</i>                                                              | <i>P</i> -1                                                                                   |
| <i>a</i> [Å]                                                       | 11.7066(7)                                                                                      | 11.8275(7)                                                                                      | 11.4773(10)                                                                                   |
| <i>b</i> [Å]                                                       | 12.6984(10)                                                                                     | 13.7942(7)                                                                                      | 21.5497(9)                                                                                    |
| <i>c</i> [Å]                                                       | 13.6077(10)                                                                                     | 37.139(2)                                                                                       | 14.462(9)                                                                                     |
| <i>α</i> [°]                                                       | 71.836(7)                                                                                       | 90                                                                                              | 104.578(6)                                                                                    |
| <i>β</i> [°]                                                       | 85.232(5)                                                                                       | 91.374(5)                                                                                       | 108.957(7)                                                                                    |
| <i>γ</i> [°]                                                       | 81.455(6)                                                                                       | 90                                                                                              | 91.628(7)                                                                                     |
| <i>V</i> [Å <sup>3</sup> ]                                         | 1899.3(2)                                                                                       | 6057.5(6)                                                                                       | 1892.8(2)                                                                                     |
| <i>d</i> [g cm <sup>-3</sup> ]                                     | 1.717                                                                                           | 1.457                                                                                           | 1.593                                                                                         |
| <i>μ</i> [mm <sup>-1</sup> ]                                       | 1.522                                                                                           | 0.981                                                                                           | 1.457                                                                                         |
| <i>F</i> (000)                                                     | 996                                                                                             | 2728                                                                                            | 928                                                                                           |
| R( <i>int</i> )                                                    | 0.0310                                                                                          | 0.0552                                                                                          | 0.0281                                                                                        |
| Final <i>R</i> indices<br>[ <i>I</i> >2σ( <i>I</i> )] <sup>a</sup> | <i>R</i> <sub>1</sub> = 0.0409<br>w <i>R</i> <sub>2</sub> = 0.1020                              | <i>R</i> <sub>1</sub> = 0.0712<br>w <i>R</i> <sub>2</sub> = 0.1730                              | <i>R</i> <sub>1</sub> = 0.0590<br>w <i>R</i> <sub>2</sub> = 0.1733                            |
| R indices<br>(all data)                                            | <i>R</i> <sub>1</sub> = 0.0480<br>w <i>R</i> <sub>2</sub> = 0.1071                              | <i>R</i> <sub>1</sub> = 0.0881<br>w <i>R</i> <sub>2</sub> = 0.1840                              | <i>R</i> <sub>1</sub> = 0.0744<br>w <i>R</i> <sub>2</sub> = 0.1863                            |
| GOF ( <i>F</i> <sup>2</sup> )                                      | 1.034                                                                                           | 1.111                                                                                           | 1.056                                                                                         |

$$^a R_1 = \sum ||F_o| - |F_c|| / \sum |F_o|; wR = \{[\sum (|F_o|^2 |F_c|^2)^2]\}^{1/2}$$

**Table S3.** Crystallographic data collection and structure refinement parameters for complexes **4** and **5**.

|                                                                     | <b>4•2DMF•DMSO•2H<sub>2</sub>O</b>                                                  | <b>5•DMF•C<sub>4</sub>H<sub>8</sub>O</b>                                                                       |
|---------------------------------------------------------------------|-------------------------------------------------------------------------------------|----------------------------------------------------------------------------------------------------------------|
| Chem. Formula                                                       | C <sub>50</sub> H <sub>51</sub> Cu <sub>2</sub> N <sub>16</sub> NaO <sub>10</sub> S | C <sub>94</sub> H <sub>82</sub> Cu <sub>4</sub> N <sub>18</sub> Na <sub>2</sub> O <sub>17</sub> S <sub>4</sub> |
| Formula weight                                                      | 1218.20                                                                             | 2164.16                                                                                                        |
| Temp (K)                                                            | 293                                                                                 | 293                                                                                                            |
| Crystal System                                                      | Monoclinic                                                                          | Monoclinic                                                                                                     |
| Space group                                                         | <i>P</i> 2 <sub>1</sub> / <i>c</i>                                                  | <i>C</i> <sub>2</sub> / <i>c</i>                                                                               |
| <i>a</i> [Å]                                                        | 13.3647(8)                                                                          | 25.553(5)                                                                                                      |
| <i>b</i> [Å]                                                        | 13.9486(7)                                                                          | 13.374(5)                                                                                                      |
| <i>c</i> [Å]                                                        | 28.7657(16)                                                                         | 28.901(4)                                                                                                      |
| $\alpha$ [°]                                                        | 90                                                                                  | 90                                                                                                             |
| $\beta$ [°]                                                         | 101.93(5)                                                                           | 109.122(13)                                                                                                    |
| $\gamma$ [°]                                                        | 90                                                                                  | 90                                                                                                             |
| <i>V</i> [Å <sup>3</sup> ]                                          | 5246.6(5)                                                                           | 9332(4)                                                                                                        |
| <i>d</i> [g cm <sup>-3</sup> ]                                      | 1.542                                                                               | 1.540                                                                                                          |
| $\mu$ [mm <sup>-1</sup> ]                                           | 0.934                                                                               | 1.077                                                                                                          |
| <i>F</i> (000)                                                      | 2512                                                                                | 4440                                                                                                           |
| <i>R</i> ( <i>int</i> )                                             | 8958 [0.1061]                                                                       | 8213 [0.3193]                                                                                                  |
| Final <i>R</i> indices<br>[ <i>I</i> > 2σ( <i>I</i> )] <sup>a</sup> | <i>R</i> <sub>1</sub> = 0.0853,<br>w <i>R</i> <sub>2</sub> = 0.1988                 | <i>R</i> <sub>1</sub> = 0.1120,<br>w <i>R</i> <sub>2</sub> = 0.2490                                            |
| <i>R</i> indices<br>(all data)                                      | <i>R</i> <sub>1</sub> = 0.1305,<br>w <i>R</i> <sub>2</sub> = 0.2244                 | <i>R</i> <sub>1</sub> = 0.1824,<br>w <i>R</i> <sub>2</sub> = 0.3131                                            |
| GOF ( <i>F</i> <sup>2</sup> )                                       | 1.032                                                                               | 1.003                                                                                                          |

<sup>a</sup>  $R_1 = \sum ||F_o| - |F_c|| / \sum |F_o|$ ;  $wR = \{[\sum (|F_o|^2 |F_c|^2)^2]\}^{1/2}$
